# Supplementary material for: A Bayesian decision support tool for efficient dose individualization of warfarin in adults and children
Source: BMC Med Inform Decis Mak. 2015 Feb 7;15:7. doi: 10.1186/s12911-014-0128-0 (PMC4324411; doi:10.1186/s12911-014-0128-0)
Supplement: Additional file 3: — Format of treatment history. Provides the Java-based decision support tool described in this paper. [file 12911_2014_128_MOESM3_ESM.xls]

## Sheet: First Sheet
Date [yyyymmdd]	Time [hh:mm]	Dose [mg]	INR	Weight [kg]	CYP2C9 genotype (*1/*1,*1/*2,*1/*3,*2/*2,*2/*3 or *3/*3)	VKORC1 genotype (G/G, A/G or A/A)
20111120	21:00	1.25	0	7	*1/*1	G/G
20111121	21:00	1.875	0	7
20111122	21:00	1.25	0	7
20111123	21:00	1.25	0	7
20111124	21:00	1.875	0	7
20111125	21:00	1.25	0	7
20111126	21:00	1.25	0	7
20111127	8:00	0	2	7
20111127	21:00	1.25	0	7
20111128	21:00	1.875	0	7
20111129	21:00	1.25	0	7
20111130	21:00	1.25	0	7
20111201	8:00	0	2.3	7
20111201	21:00	1.875	0	7
20111202	21:00	1.25	0	7
20111203	21:00	1.25	0	7
20111204	21:00	1.25	0	7
20111205	21:00	1.875	0	7
20111206	21:00	1.25	0	7
20111207	21:00	1.25	0	7
20111208	21:00	1.875	0	7
20111209	21:00	1.25	0	7
20111210	21:00	1.25	0	7
20111211	21:00	1.25	0	7
20111212	21:00	1.875	0	7
20111213	21:00	1.25	0	7
20111214	8:00	0	2.5	7
20111214	21:00	1.25	0	7
20111215	21:00	1.875	0	7
