# Supplementary material for: A Bayesian decision support tool for efficient dose individualization of warfarin in adults and children
Source: Springer Nature journal article supplement (doi:10.1186/s12911-014-0128-0), 2015-02-06
Supplement: MOESM2 [file 9756250]

## **Important information regarding naming of Excel-files for importation of treatment data into the Warfarin Dose Calculator**

The file-name should consist of three parts, the first two separated by a hyphen.

Example: AAAAA-XXXXXXXXXXZZZ.

- The first part is flexible and can be a patients name, a code or something else. The number of characters is not critical.
- The second part must be the patients date of birth, written in the following format: `yyyymmdd`  
Example: 19640515 for a person born on May 15, 1964
- The third part must be numerical, with a combination of four digits. In Sweden these four digits when combined with the patient's data of birth forms a persons Social Security Number, which provides a unique identifier for each citizen.

Example of a valid file-name: Ann Smith-196405155208.xls
